# Supplementary material for: Ice nucleating particles over the Eastern Mediterranean measured by unmanned aircraft systems
Source: Copernicus journal article supplement (doi:10.5194/acp-17-4817-2017), 2017-04-12
Supplement: Supplementary file 1 [file acp-17-4817-2017-supplement.zip]

Archive with 8 entries (8 files):
- Supplement.pdf
- Sf02.jpg
- Sm01.wmv
- Sf01.jpg
- acp-17-4817-2017-supplement-title-page.pdf
- Sf05.jpg
- Sf04.jpg
- Sf03.jpg
