# Supplementary material for: Ice nucleating particles over the Eastern Mediterranean measured by unmanned aircraft systems
Source: Copernicus journal article supplement (doi:10.5194/acp-17-4817-2017), 2017-04-12
Supplement: Supplementary file 1 [file acp-17-4817-2017-supplement.zip › acp-17-4817-2017-supplement-title-page.pdf]

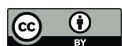

## *Supplement of*

# **Ice nucleating particles over the Eastern Mediterranean measured by unmanned aircraft systems**

**Jann Schrod et al.**

*Correspondence to:* Jann Schrod ([schrod@iau.uni-frankfurt.de](mailto:schrod@iau.uni-frankfurt.de))

- [acp-17-4817-2017-supplement-title-page.pdf](#)
- [Sf01.jpg](#)
- [Sf02.jpg](#)
- [Sf03.jpg](#)
- [Sf04.jpg](#)
- [Sf05.jpg](#)
- [Sm01.wmv](#)
- [Supplement.pdf](#)

The copyright of individual parts of the supplement might differ from the CC-BY 3.0 licence.
