# Supplementary figures and images for: Ice nucleating particles over the Eastern Mediterranean measured by unmanned aircraft systems
Source: Copernicus journal article supplement (doi:10.5194/acp-17-4817-2017), 2017-04-12

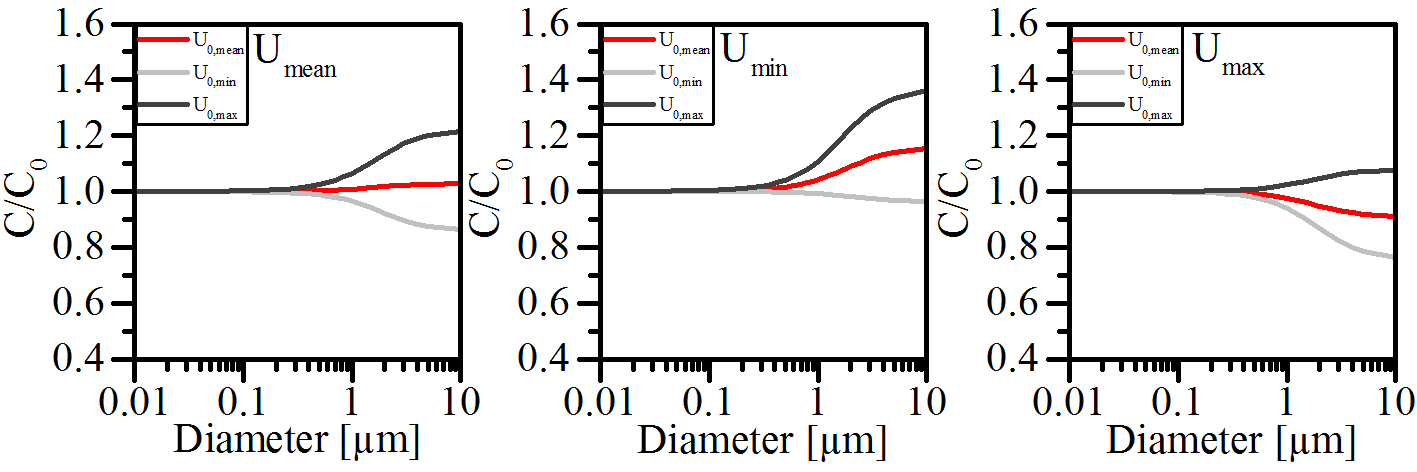

Supplement: Supplementary file 1 [file acp-17-4817-2017-supplement.zip › Sf02.jpg]

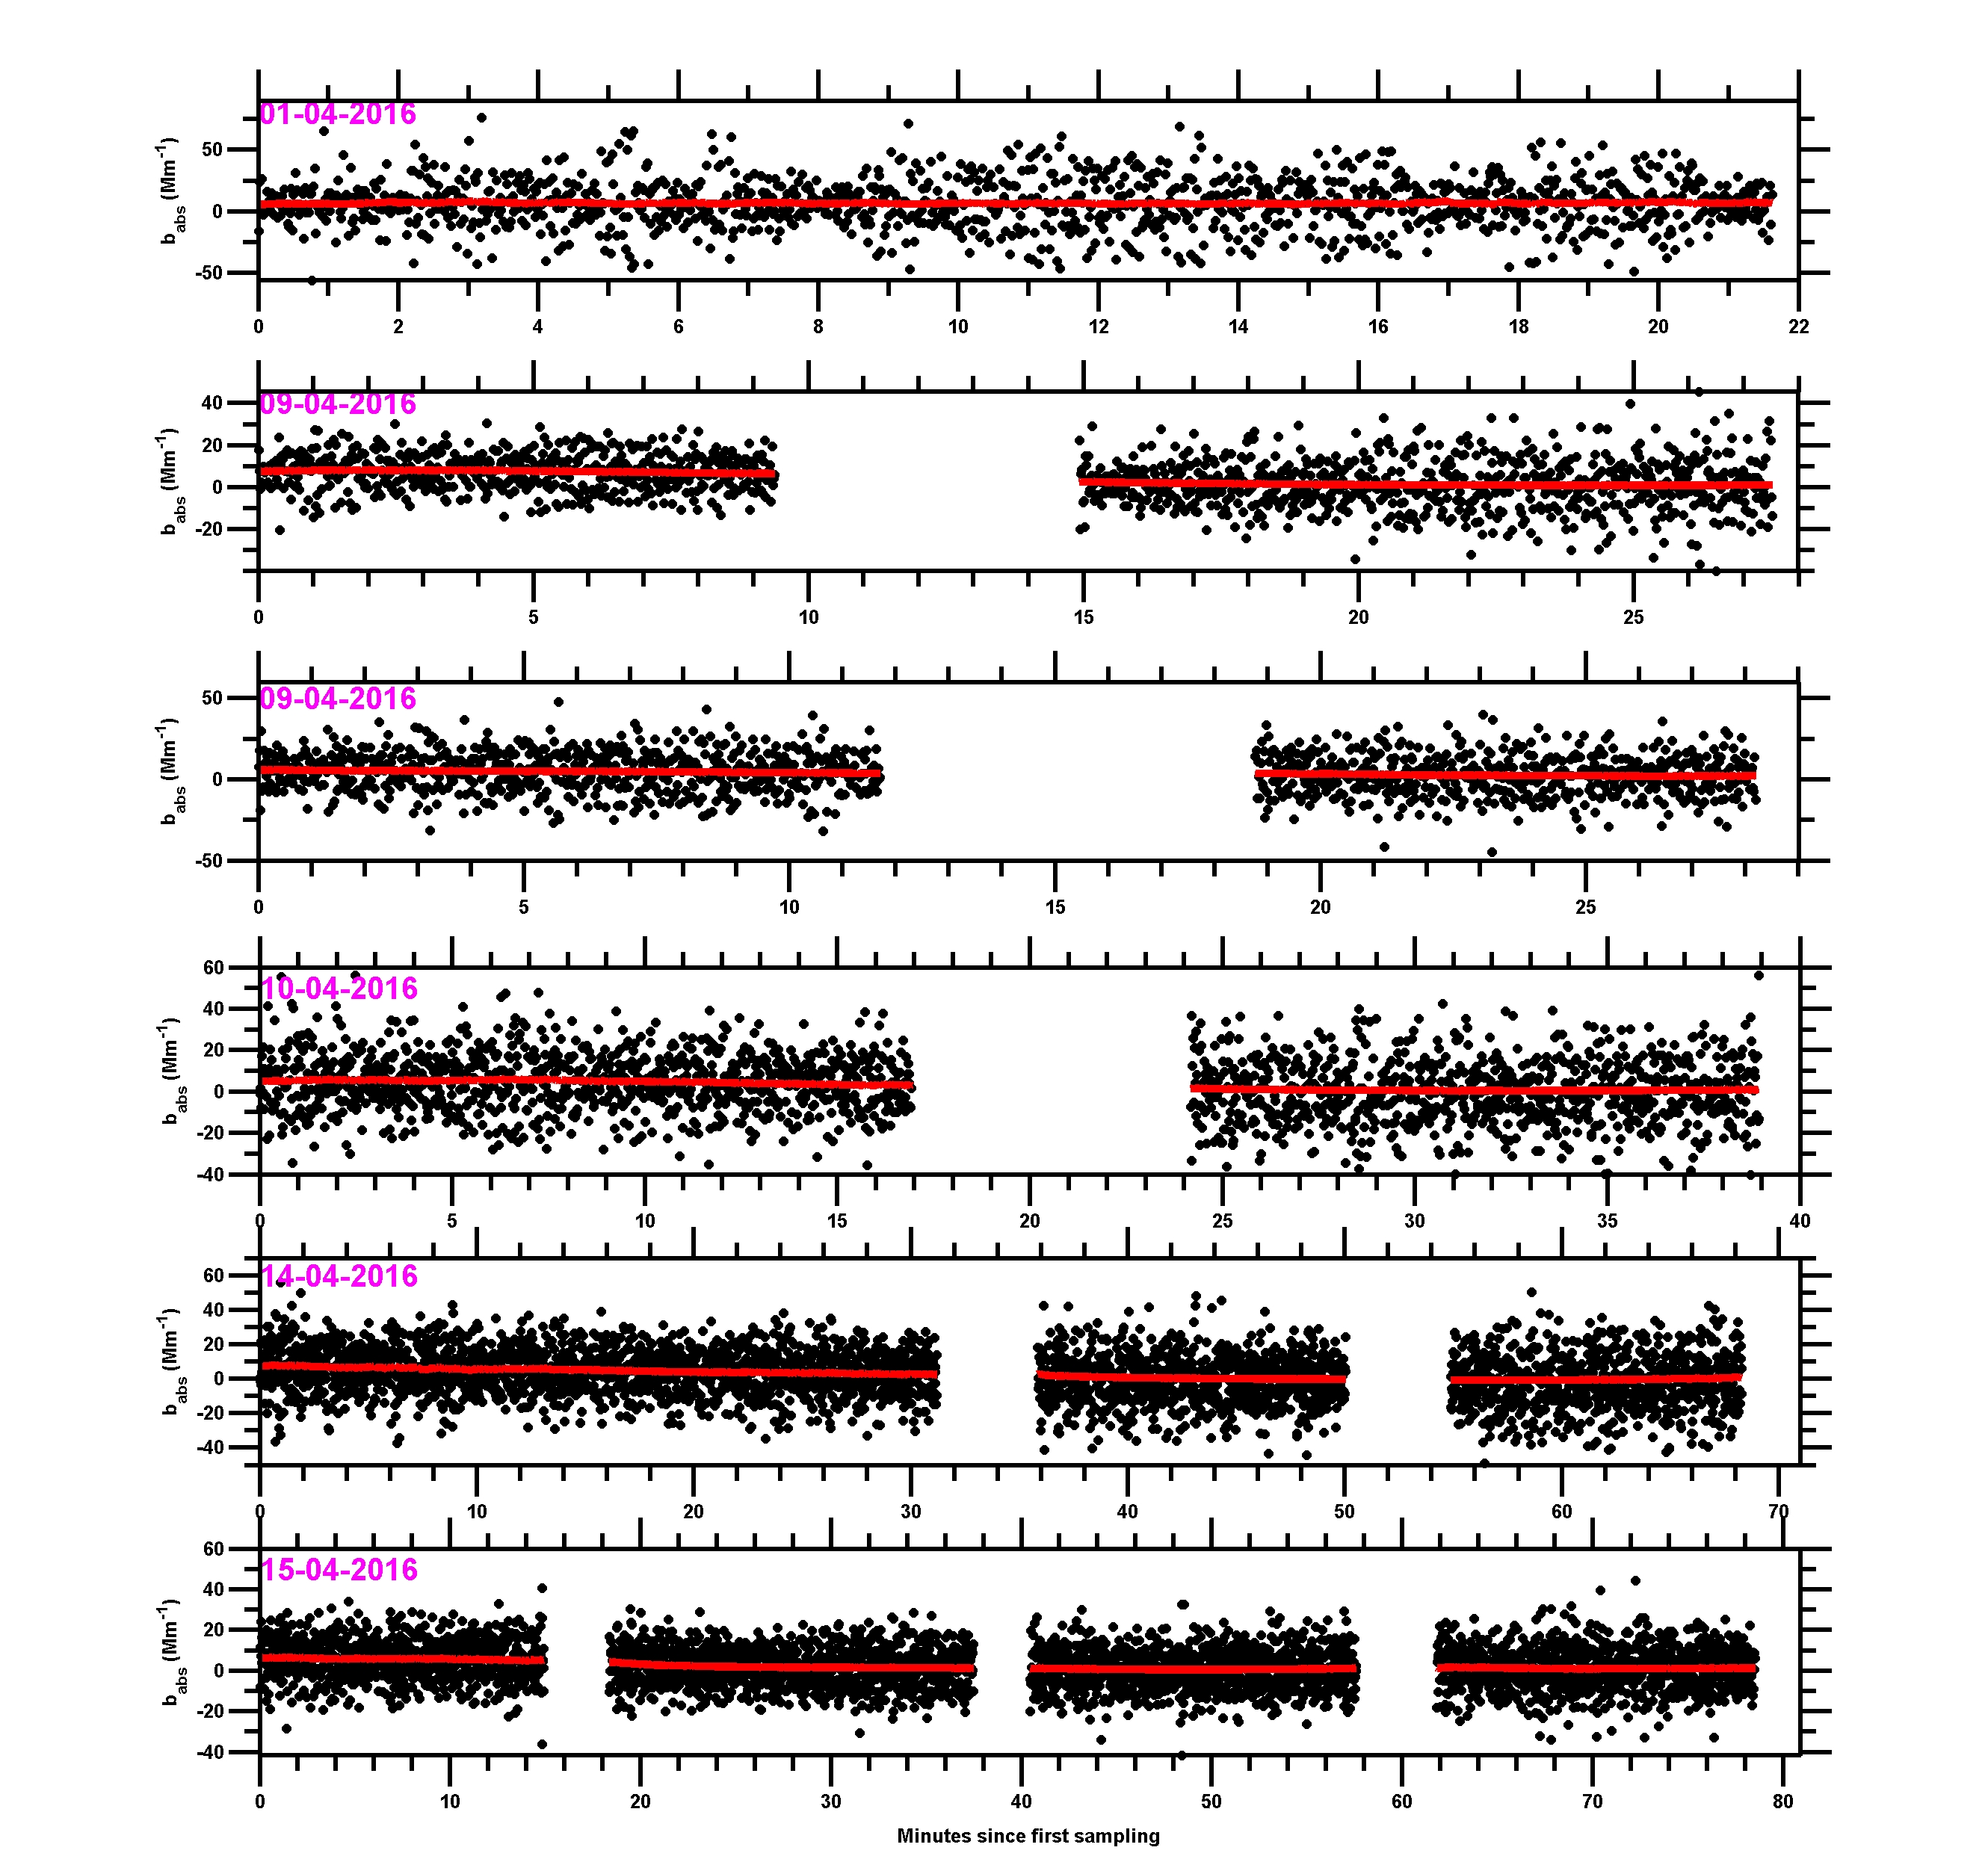

Supplement: Supplementary file 1 [file acp-17-4817-2017-supplement.zip › Sf01.jpg]

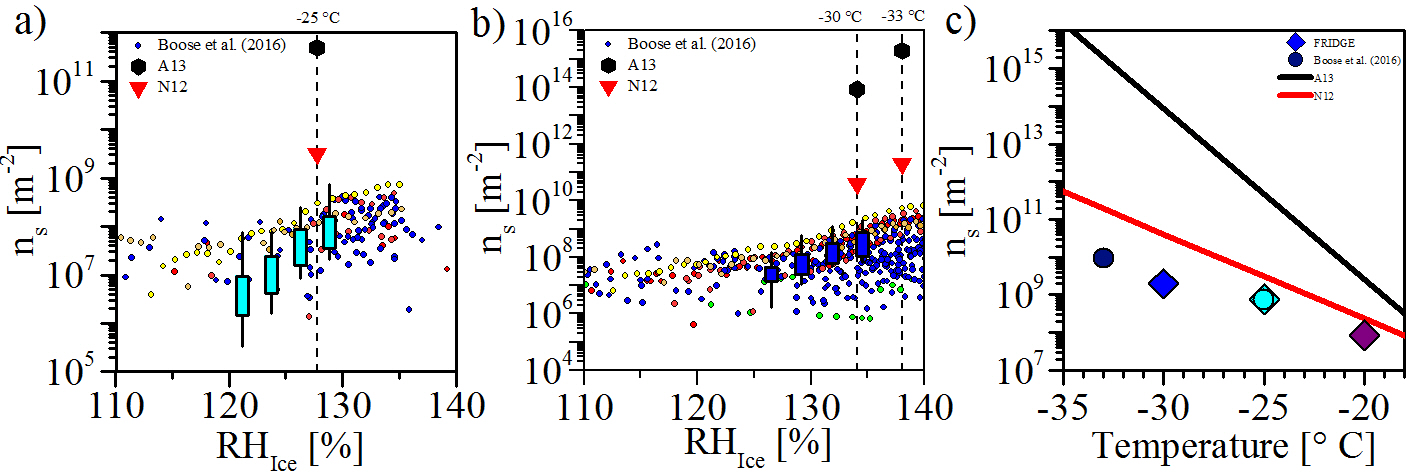

Supplement: Supplementary file 1 [file acp-17-4817-2017-supplement.zip › Sf05.jpg]

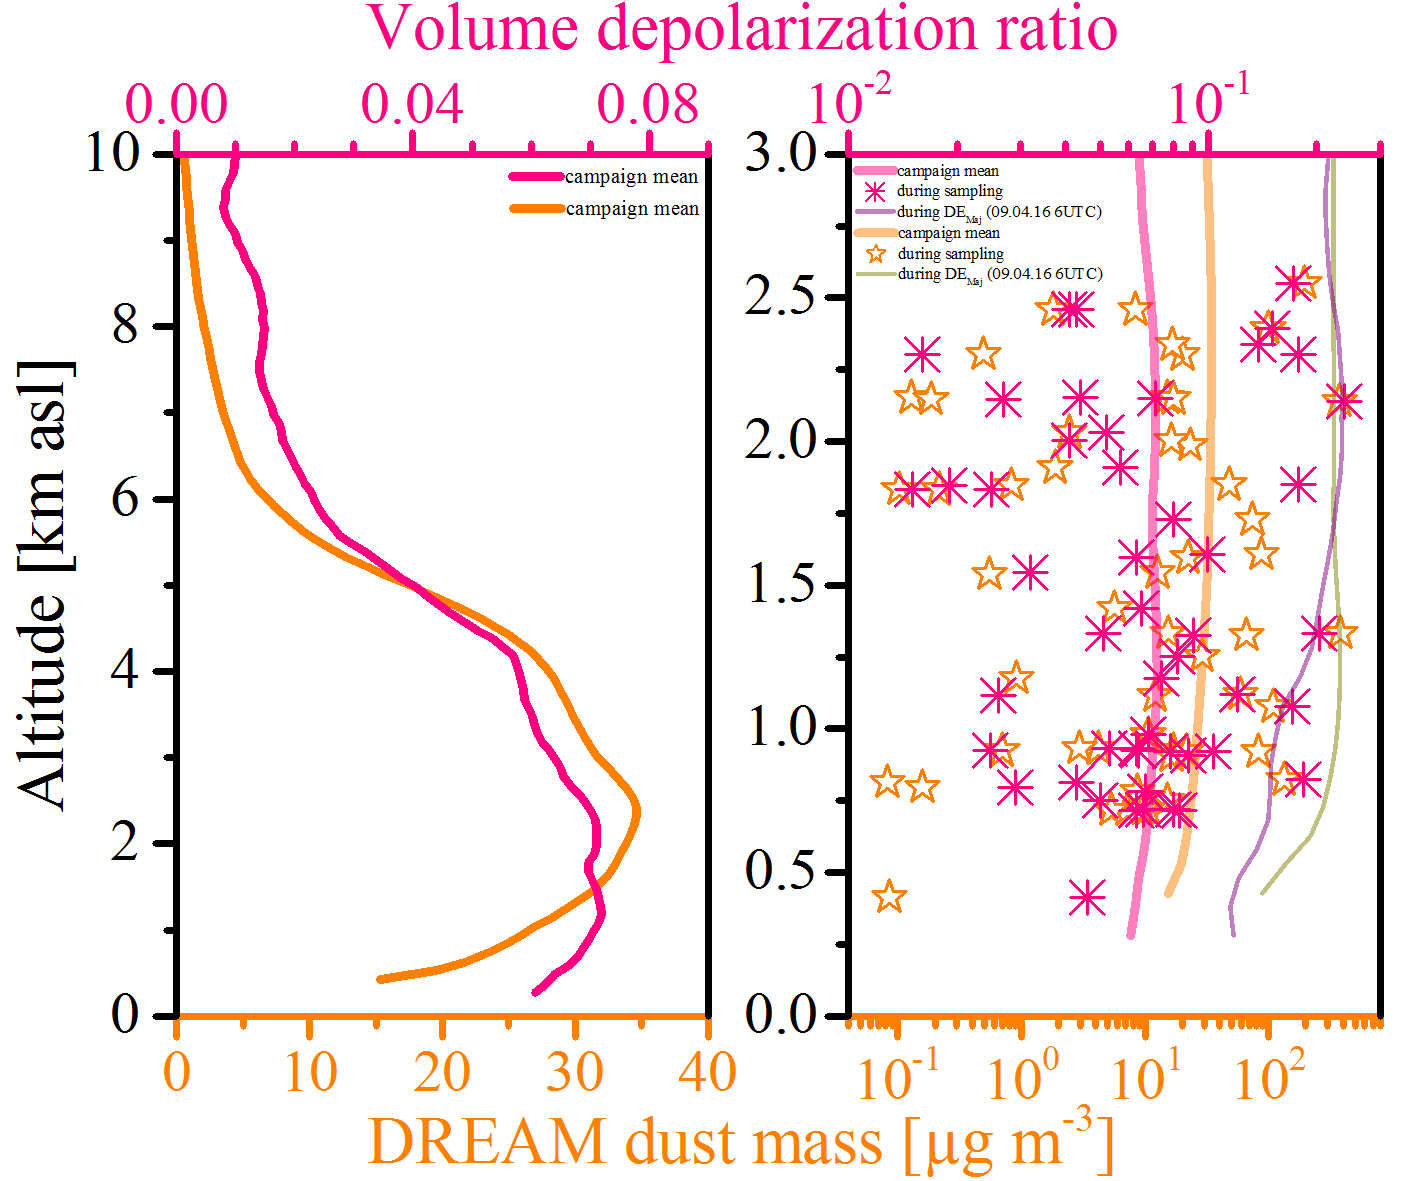

Supplement: Supplementary file 1 [file acp-17-4817-2017-supplement.zip › Sf04.jpg]

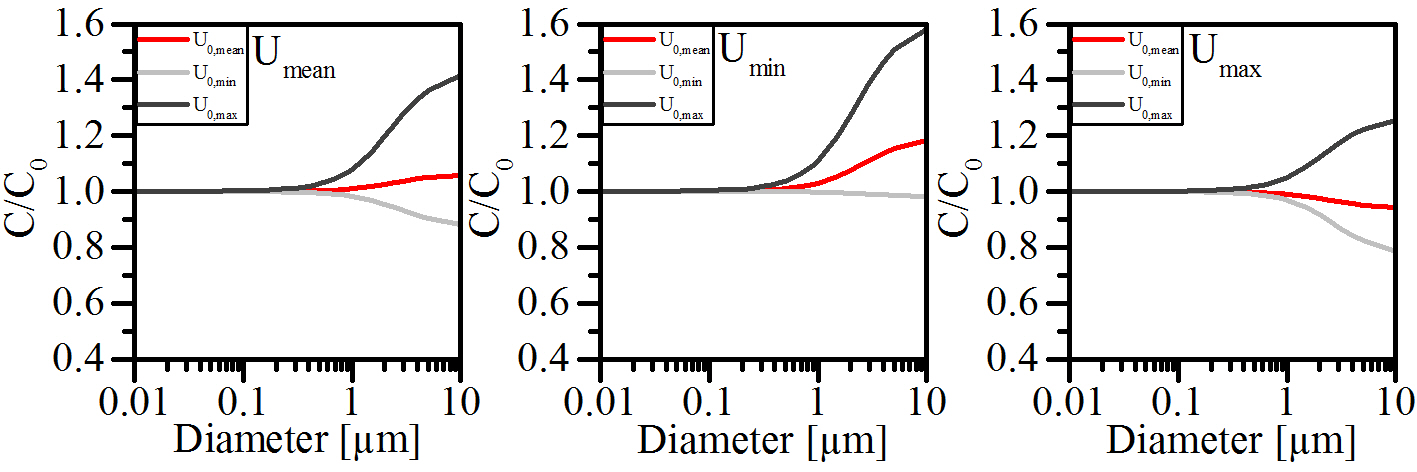

Supplement: Supplementary file 1 [file acp-17-4817-2017-supplement.zip › Sf03.jpg]
